# Supplementary material for: Trends in Diet Quality Among Older US Adults From 2001 to 2018
Source: PubMed Central journal article supplement (PMC8917422; doi:10.1001/jamanetworkopen.2022.1880), 2022-03-11

## Supplementary Online Content

Long T, Zhang K, Chen Y, Wu C. Trends in diet quality among older US adults from 2001 to 2018. *JAMA Netw Open*. 2022;5(3):e221880. doi:10.1001/jamanetworkopen.2022.1880

**eTable 1.** Dietary Components of the American Heart Association (AHA) 2020 Strategic Impact Goals Scoring Standards

**eTable 2.** Dietary Components of the Healthy Eating Index (HEI)-2015 and Scoring Standards

**eTable 3.** Trends in Estimated Secondary American Heart Association (AHA) Diet Scores by Sociodemographic Characteristics, NHANES Survey Cycles, 2001-2018

**eFigure.** Trends in Mean Diet Quality Score Among US Adults Aged  $\geq 65$  Years by NHANES Survey Cycles, 2001-2018

This supplementary material has been provided by the authors to give readers additional information about their work.

**eTable 1.** Dietary Components of the American Heart Association (AHA) 2020 Strategic Impact Goals Scoring Standards

| AHA Components                          | Points Range | Scoring Standard <sup>a</sup> |                          |
|-----------------------------------------|--------------|-------------------------------|--------------------------|
|                                         |              | Max                           | Min                      |
| <b>Primary Components<sup>b</sup></b>   | 0-50         |                               |                          |
| Fruits and vegetables <sup>c</sup>      | 0-10         | ≥4.5 cups equiv. per day      | 0                        |
| Fish and shellfish                      | 0-10         | ≥1 oz equiv. per day          | 0                        |
| Whole grains                            | 0-10         | ≥3 oz equiv. per day          | 0                        |
| Sugar-sweetened beverages               | 10-0         | ≤ 5.14 fl oz per day          | >16 fl per day           |
| Sodium                                  | 10-0         | ≤ 1500 mg per day             | >4500 mg per day         |
| <b>Secondary Components<sup>b</sup></b> | 0-80         |                               |                          |
| Nuts, seeds and legumes <sup>d</sup>    | 0-10         | ≥4 servings per day           | 0                        |
| Processed meat                          | 10-0         | ≤ 0.5 oz equiv. per day       | >1.764 oz equiv. per day |
| Saturated fat                           | 10-0         | ≤7% energy                    | >15% energy              |

<sup>a</sup> Intakes between the minimum and maximum standards are scored proportionately.

<sup>b</sup> All AHA dietary variables were energy-adjusted to 2000kcal/d using the residual method prior to analysis.

<sup>c</sup> According to the AHA 2020 Goals, up to 3 cups/wk (0.42 cups/d) of starchy vegetables (e.g., potatoes, peas, corn) could be included; this maximum was incorporated into the analysis, with higher intake not contributing toward the score. 100% fruit juice could also be included; while its contribution was not capped in the original AHA 2020 Goals and thus not in our score, some organizations recommend no more than 1 serving/d of 100% fruit juice.

<sup>d</sup> A serving of nuts, seeds and legumes is 1-oz equivalent of nuts and seeds or 1/2 cup of legume.

**eTable 2.** Dietary Components of the Healthy Eating Index (HEI)-2015 and Scoring Standards

| HEI-2015 Components                       | Points Range | Scoring Standard <sup>a</sup>  |                               |
|-------------------------------------------|--------------|--------------------------------|-------------------------------|
|                                           |              | Max                            | Min                           |
| <b>Adequacy Components</b>                |              |                                |                               |
| Total Fruits <sup>b</sup>                 | 0-5          | ≥0.8 cup equiv. per 1,000 kcal | 0                             |
| Whole Fruits <sup>c</sup>                 | 0-5          | ≥0.4 cup equiv. per 1,000 kcal | 0                             |
| Total Vegetables <sup>d</sup>             | 0-5          | ≥1.1 cup equiv. per 1,000 kcal | 0                             |
| Greens and Beans <sup>d</sup>             | 0-5          | ≥0.2 cup equiv. per 1,000 kcal | 0                             |
| Whole Grains                              | 0-10         | ≥1.5 oz equiv. per 1,000 kcal  | 0                             |
| Dairy <sup>e</sup>                        | 0-10         | ≥1.3 cup equiv. per 1,000 kcal | 0                             |
| Total Protein Foods <sup>f</sup>          | 0-5          | ≥2.5 oz equiv. per 1,000 kcal  | 0                             |
| Seafood and Plant Proteins <sup>e,g</sup> | 0-5          | ≥0.8 oz equiv. per 1,000 kcal  | 0                             |
| Fatty Acids                               | 0-10         | (PUFAs + MUFAs)/SFAs ≥2.5      | (PUFAs + MUFAs)/SFAs ≤1.2     |
| <b>HEI-2015 Moderation</b>                |              |                                |                               |
| Refined Grains                            | 10-0         | ≤1.8 oz equiv. per 1,000 kcal  | ≥4.3 oz equiv. per 1,000 kcal |
| Sodium                                    | 10-0         | ≤1.1 grams per 1,000 kcal      | ≥2.0 grams per 1,000 kcal     |
| Added Sugars                              | 10-0         | ≤6.5% of energy                | ≥26% of energy                |
| Saturated Fats                            | 10-0         | ≤8% of energy                  | ≥16% of energy                |

<sup>a</sup> Intakes between the minimum and maximum standards are scored proportionately.

<sup>b</sup> Includes 100% fruit juice.

<sup>c</sup> Includes all forms except juice.

<sup>d</sup> Includes legumes (beans and peas)

<sup>e</sup> Includes all milk products, such as fluid milk, yogurt, and cheese, and fortified soy beverages.

<sup>f</sup> Includes legumes (beans and peas)

<sup>g</sup> Includes seafood, nuts, seeds, soy products (other than beverages), and legumes (beans and peas).

<sup>h</sup> Ratios of poly-and monosaturated fatty acids (PUFAs and MUFAs) to saturated fatty acids (SFAs).

**eTable 3.** Trends in Estimated Secondary American Heart Association (AHA) Diet Scores by Sociodemographic Characteristics, NHANES Survey Cycles, 2001-2018

| Survey-weighted mean, 95%CI |                             |                        |                        |                        |                        |                        |                        |                        |                        |                        |             |                   |
|-----------------------------|-----------------------------|------------------------|------------------------|------------------------|------------------------|------------------------|------------------------|------------------------|------------------------|------------------------|-------------|-------------------|
|                             |                             | 2001-2002              | 2003-2004              | 2005-2006              | 2007-2008              | 2009-2010              | 2011-2012              | 2013-2014              | 2015-2016              | 2017-2018              | P for trend | P for interaction |
| <b>AHA Secondary score</b>  |                             |                        |                        |                        |                        |                        |                        |                        |                        |                        |             |                   |
| <b>Age group, y</b>         |                             |                        |                        |                        |                        |                        |                        |                        |                        |                        |             |                   |
|                             | 65-69                       | 33.97<br>(32.41-35.53) | 31.26<br>(29.56-32.96) | 36.46<br>(34.71-38.21) | 31.54<br>(29.99-33.09) | 34.92<br>(33.40-36.45) | 32.74<br>(30.55-34.93) | 33.68<br>(32.23-35.13) | 33.44<br>(31.51-35.37) | 29.51<br>(27.45-31.57) | 0.02        | Ref               |
|                             | 70-74                       | 34.01<br>(32.53-35.49) | 33.46<br>(32.02-34.91) | 38.05<br>(36.37-39.73) | 33.45<br>(32.04-34.86) | 35.52<br>(34.30-36.74) | 34.06<br>(32.57-35.56) | 35.24<br>(33.52-36.96) | 33.87<br>(32.07-35.67) | 31.45<br>(29.84-33.07) | 0.008       | 0.93              |
|                             | 75-79                       | 34.06<br>(32.31-35.82) | 34.19<br>(32.59-35.79) | 37<br>(35.10-38.89)    | 34.12<br>(32.78-35.46) | 35.38<br>(33.91-36.84) | 32.14<br>(30.56-33.71) | 34.09<br>(32.21-35.98) | 33.62<br>(31.65-35.58) | 31.82<br>(29.96-33.67) | 0.006       | 0.85              |
|                             | ≥ 80                        | 35.38<br>(34.16-36.61) | 35.57<br>(34.46-3.67)  | 40.47<br>(39.27-41.68) | 35.19<br>(33.97-36.41) | 38.34<br>(37.23-39.45) | 34.45<br>(33.21-35.69) | 37.14<br>(35.73-38.56) | 35.24<br>(34.06-36.43) | 30.29<br>(28.89-31.69) | <0.001      | 0.14              |
| <b>Sex</b>                  |                             |                        |                        |                        |                        |                        |                        |                        |                        |                        |             |                   |
|                             | Female                      | 35.58<br>(34.57-36.59) | 34.24<br>(33.19-35.29) | 39.89<br>(38.78-41.00) | 34.39<br>(33.43-35.34) | 37.46<br>(36.58-38.35) | 34.91<br>(33.74-36.08) | 35.91<br>(34.88-36.94) | 35.61<br>(34.34-36.88) | 31.78<br>(30.53-33.03) | <0.001      | 0.88              |
|                             | Male                        | 32.69<br>(31.56-33.82) | 32.39<br>(31.28-33.50) | 35.21<br>(33.96-36.47) | 32.19<br>(31.12-33.27) | 34.17<br>(33.07-35.26) | 31.62<br>(30.25-32.99) | 33.69<br>(32.39-34.99) | 31.79<br>(30.42-33.16) | 29.19<br>(27.72-30.66) | <0.001      | Ref               |
| <b>Race/Ethnicity</b>       |                             |                        |                        |                        |                        |                        |                        |                        |                        |                        |             |                   |
|                             | Non-Hispanic White          | 36.27<br>(33.75-38.80) | 36.39<br>(34.43-38.35) | 38.83<br>(36.32-41.35) | 36.78<br>(35.30-38.26) | 37.87<br>(36.53-39.21) | 33.64<br>(31.64-35.63) | 35.66<br>(33.91-37.41) | 37.27<br>(36.04-38.50) | 33.99<br>(32.11-35.87) | 0.04        | Ref               |
|                             | Non-Hispanic Black          | 42.5<br>(33.20-51.80)  | 42.14<br>(37.94-46.34) | 45.53<br>(40.65-50.41) | 41.78<br>(7.02-46.53)  | 40.95<br>(37.86-44.04) | 36.7<br>(32.69-40.71)  | 41.26<br>(38.78-43.74) | 36.22<br>(33.30-39.14) | 36.9<br>(34.75-39.05)  | <0.001      | 0.006             |
|                             | Hispanics                   | 34.06<br>(33.27-34.86) | 32.92<br>(32.12-33.72) | 37.62<br>(36.73-38.51) | 32.92<br>(32.16-33.68) | 35.64<br>(34.88-36.40) | 33.19<br>(32.20-34.18) | 34.47<br>(33.56-35.37) | 33.47<br>(32.40-34.55) | 29.86<br>(28.79-30.94) | <0.001      | 0.26              |
| <b>Marital Status</b>       |                             |                        |                        |                        |                        |                        |                        |                        |                        |                        |             |                   |
|                             | Married/Living with partner | 33.98<br>(32.95-35.02) | 33.83<br>(32.80-34.86) | 37.56<br>(36.40-38.71) | 33.35<br>(32.34-34.36) | 35.7<br>(34.77-36.64)  | 33.32<br>(32.09-34.55) | 34.89<br>(33.80-35.97) | 33.73<br>(32.43-35.03) | 30.33<br>(29.07-31.59) | <0.001      | Ref               |
|                             | Widowed                     | 35.03                  | 33.47                  | 38.94                  | 34.51                  | 36.9                   | 33.99                  | 35.62                  | 34.11                  | 31.58                  | 0.003       | 0.60              |

|                                                                                                                                                                                                                                                                                                                                                                                                                                                                |                             |               |               |               |               |               |               |               |               |               |        |       |
|----------------------------------------------------------------------------------------------------------------------------------------------------------------------------------------------------------------------------------------------------------------------------------------------------------------------------------------------------------------------------------------------------------------------------------------------------------------|-----------------------------|---------------|---------------|---------------|---------------|---------------|---------------|---------------|---------------|---------------|--------|-------|
|                                                                                                                                                                                                                                                                                                                                                                                                                                                                |                             | (33.73-36.33) | (32.22-34.72) | (37.44-40.44) | (33.29-35.72) | (35.76-38.05) | (32.52-35.46) | (34.02-37.22) | (32.25-35.97) | (29.71-33.45) |        |       |
|                                                                                                                                                                                                                                                                                                                                                                                                                                                                | Divorced/Separated          | 33.96         | 30.76         | 36.77         | 32.38         | 35.01         | 32.23         | 32.61         | 34.26         | 30.83         | 0.17   | 0.33  |
|                                                                                                                                                                                                                                                                                                                                                                                                                                                                |                             | (31.36-36.55) | (28.23-33.28) | (34.23-39.30) | (30.56-34.20) | (32.54-37.49) | (29.65-34.81) | (30.68-34.53) | (32.43-36.08) | (28.36-33.31) |        |       |
|                                                                                                                                                                                                                                                                                                                                                                                                                                                                | Never married               | 33.92         | 34.35         | 41.6          | 32.07         | 37.77         | 36.04         | 40.09         | 36.69         | 27.51         | 0.47   | 0.67  |
|                                                                                                                                                                                                                                                                                                                                                                                                                                                                |                             | (29.02-38.82) | (29.03-39.66) | (38.07-45.14) | (28.00-36.13) | (34.93-40.61) | (32.92-39.16) | (36.03-44.16) | (31.36-42.02) | (23.78-31.23) |        |       |
| <b>Education Level</b>                                                                                                                                                                                                                                                                                                                                                                                                                                         |                             |               |               |               |               |               |               |               |               |               |        |       |
|                                                                                                                                                                                                                                                                                                                                                                                                                                                                | < high school diploma       | 33.28         | 31.22         | 37.98         | 31.94         | 35.28         | 32.44         | 34.32         | 35.75         | 30.09         | 0.74   | Ref   |
|                                                                                                                                                                                                                                                                                                                                                                                                                                                                |                             | (31.94-34.63) | (30.00-32.43) | (36.57-39.39) | (30.75-33.12) | (34.15-36.40) | (31.15-33.74) | (32.63-36.02) | (34.32-37.18) | (27.76-32.42) |        |       |
|                                                                                                                                                                                                                                                                                                                                                                                                                                                                | High school graduate or GED | 33.68         | 33.88         | 37.05         | 33.41         | 34.69         | 32.15         | 34.35         | 33.18         | 28.62         | <0.001 | 0.001 |
|                                                                                                                                                                                                                                                                                                                                                                                                                                                                |                             | (32.21-35.15) | (32.47-35.29) | (35.42-38.67) | (32.13-34.68) | (33.33-36.05) | (30.16-34.14) | (32.78-35.92) | (31.24-35.13) | (26.89-30.36) |        |       |
|                                                                                                                                                                                                                                                                                                                                                                                                                                                                | Some college                | 35.02         | 33.08         | 38.06         | 32.84         | 36.65         | 33.36         | 34.24         | 32.67         | 31.66         | <0.001 | 0.02  |
|                                                                                                                                                                                                                                                                                                                                                                                                                                                                |                             | (33.56-36.49) | (31.37-34.79) | (36.33-39.80) | (31.18-34.51) | (35.19-38.11) | (31.62-35.10) | (32.71-35.77) | (31.10-34.24) | (29.95-33.37) |        |       |
|                                                                                                                                                                                                                                                                                                                                                                                                                                                                | ≥ College degree            | 35.87         | 36.71         | 38.84         | 36.11         | 37.27         | 35.48         | 36.29         | 35.01         | 31.52         | <0.001 | 0.001 |
|                                                                                                                                                                                                                                                                                                                                                                                                                                                                |                             | (34.00-37.74) | (34.78-38.65) | (36.69-40.99) | (34.40-37.83) | (35.66-38.88) | (33.40-37.56) | (34.65-37.92) | (32.86-37.16) | (29.67-33.36) |        |       |
| <b>Ratio of family income to poverty level</b>                                                                                                                                                                                                                                                                                                                                                                                                                 |                             |               |               |               |               |               |               |               |               |               |        |       |
|                                                                                                                                                                                                                                                                                                                                                                                                                                                                | <1.30                       | 33.98         | 31.87         | 38.22         | 33.12         | 35.84         | 33.05         | 34.88         | 34.16         | 31.4          | 0.27   | Ref   |
|                                                                                                                                                                                                                                                                                                                                                                                                                                                                |                             | (32.50-35.46) | (30.36-33.39) | (36.35-40.09) | (31.79-34.45) | (34.55-37.12) | (31.63-34.47) | (33.19-36.57) | (32.54-35.79) | (29.57-33.23) |        |       |
|                                                                                                                                                                                                                                                                                                                                                                                                                                                                | 1.30 to <1.85               | 32.05         | 31.1          | 36.2          | 33.15         | 35.53         | 30.73         | 34.75         | 32.26         | 31.43         | 0.44   | 0.88  |
|                                                                                                                                                                                                                                                                                                                                                                                                                                                                |                             | (29.98-34.11) | (29.16-33.04) | (34.22-38.17) | (31.45-34.85) | (33.74-37.33) | (27.60-33.85) | (32.47-37.04) | (30.49-34.02) | (29.82-33.03) |        |       |
|                                                                                                                                                                                                                                                                                                                                                                                                                                                                | 1.85 to <3.00               | 33.92         | 33.82         | 38.45         | 32.62         | 34.79         | 33.78         | 34.5          | 32.78         | 28.79         | <0.001 | 0.009 |
|                                                                                                                                                                                                                                                                                                                                                                                                                                                                |                             | (32.49-35.36) | (32.24-35.39) | (36.75-40.15) | (31.21-34.03) | (33.40-36.18) | (31.81-35.74) | (32.85-36.16) | (30.96-34.59) | (26.73-30.85) |        |       |
|                                                                                                                                                                                                                                                                                                                                                                                                                                                                | ≥ 3.00                      | 35.23         | 34.82         | 37.74         | 34.26         | 36.4          | 33.91         | 35.12         | 33.98         | 30.69         | <0.001 | 0.009 |
|                                                                                                                                                                                                                                                                                                                                                                                                                                                                |                             | (33.82-36.65) | (33.45-36.19) | (36.20-39.27) | (32.86-35.67) | (35.16-37.64) | (32.39-35.43) | (33.79-36.46) | (32.18-35.78) | (29.06-32.31) |        |       |
| <p>Abbreviations: GED, general equivalency diploma; NHANES, National Health and Nutrition Examination Survey.</p> <p><sup>a</sup> Data were weighted to be nationally representative. P for trend was estimated by treating survey-cycle as a continuous variable in a survey-weighted logistic regression model. P for interaction was calculated using the regression model for an interaction term between survey-cycle and sociodemographic subgroups.</p> |                             |               |               |               |               |               |               |               |               |               |        |       |

**eFigure.** Trends in Mean Diet Quality Score Among US Adults Aged  $\geq 65$  years by NHANES Survey Cycles, 2001-2018

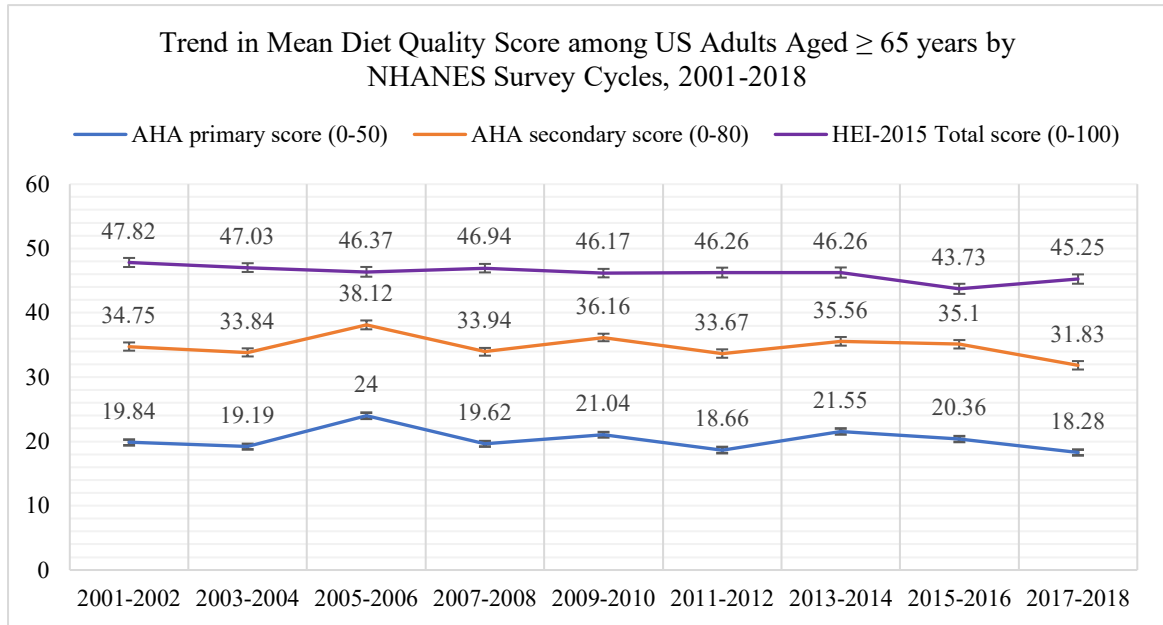

Supplement: jamanetwopen-e221880-s001.pdf [file jamanetwopen-e221880-s001.pdf]
